# Supplementary material
Source: publisher figshare collection journal article supplement (https://frontiersin.figshare.com/ndownloader/files/31747313)

# Nonlinear Curve Fit (Compertz2 (User)) (2020/6/21 12:46:09)

## Parameters

|   |   | Value     | Standard Error |
|---|---|-----------|----------------|
| C | a | 0.57576   | 0.23737        |
|   | b | -21.10828 | 33.36914       |

Reduced Chi-sqr = 40.8797563005

COD(R^2) = 0.7285799004276

Iterations Performed = 9

Total Iterations in Session = 9

Fit converged. Chi-Sqr tolerance value of 1E-9 was reached.

## Statistics

|                         | C              |
|-------------------------|----------------|
| Number of Points        | 5              |
| Degrees of Freedom      | 3              |
| Reduced Chi-Sqr         | 40.87976       |
| Residual Sum of Squares | 122.63927      |
| Adj. R-Square           | 0.63811        |
| Fit Status              | Succeeded(100) |

Fit Status Code :

100 : Fit converged. Chi-Sqr tolerance value of 1E-9 was reached.

## Summary

|   | a       |                | b         |                | Statistics      |               |
|---|---------|----------------|-----------|----------------|-----------------|---------------|
|   | Value   | Standard Error | Value     | Standard Error | Reduced Chi-Sqr | Adj. R-Square |
| C | 0.57576 | 0.23737        | -21.10828 | 33.36914       | 40.87976        | 0.63811       |

## ANOVA

|   |                   | DF | Sum of Squares | Mean Square | F Value  | Prob>F  |
|---|-------------------|----|----------------|-------------|----------|---------|
| C | Regression        | 2  | 4789.76017     | 2394.88008  | 58.58352 | 0.00463 |
|   | Residual          | 3  | 122.63927      | 40.87976    |          |         |
|   | Uncorrected Total | 5  | 4912.39944     |             |          |         |
|   | Corrected Total   | 4  | 451.84299      |             |          |         |

## Fitted Curves Plot

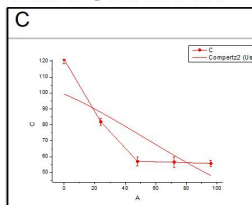

## Residual vs. Independent Plot

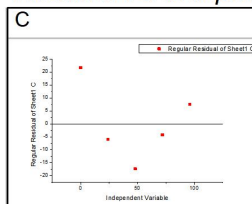

# Nonlinear Curve Fit (Compertz2 (User)) (2020/6/21 12:47:05)

## Parameters

|   |   | Value   | Standard Error |
|---|---|---------|----------------|
| D | a | 1.91339 | 0.77181        |
|   | b | 5.16867 | 10.86143       |

Reduced Chi-sqr = 44.0751017181

COD(R^2) = 0.92760881230048

Iterations Performed = 9

Total Iterations in Session = 9

Fit converged. Chi-Sqr tolerance value of 1E-9 was reached.

## Statistics

|                         | D              |
|-------------------------|----------------|
| Number of Points        | 5              |
| Degrees of Freedom      | 3              |
| Reduced Chi-Sqr         | 44.0751        |
| Residual Sum of Squares | 132.22531      |
| Adj. R-Square           | 0.90348        |
| Fit Status              | Succeeded(100) |

Fit Status Code :

100 : Fit converged. Chi-Sqr tolerance value of 1E-9 was reached.

## Summary

|   | a       |                | b       |                | Statistics      |               |
|---|---------|----------------|---------|----------------|-----------------|---------------|
|   | Value   | Standard Error | Value   | Standard Error | Reduced Chi-Sqr | Adj. R-Square |
| D | 1.91339 | 0.77181        | 5.16867 | 10.86143       | 44.0751         | 0.90348       |

## ANOVA

|   |                   | DF | Sum of Squares | Mean Square | F Value | Prob>F  |
|---|-------------------|----|----------------|-------------|---------|---------|
| D | Regression        | 2  | 6061.6139      | 3030.80695  | 68.7646 | 0.00367 |
|   | Residual          | 3  | 132.22531      | 44.0751     |         |         |
|   | Uncorrected Total | 5  | 6193.8392      |             |         |         |
|   | Corrected Total   | 4  | 1826.53869     |             |         |         |

## Fitted Curves Plot

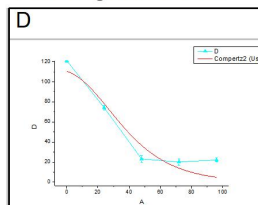

## Residual vs. Independent Plot

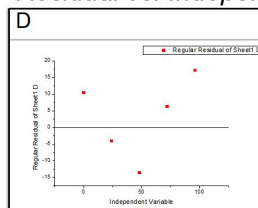

# Nonlinear Curve Fit (Compertz2 (User)) (2020/6/21 12:44:39)

## Parameters

|   |   | Value   | Standard Error |
|---|---|---------|----------------|
| G | a | 0.43934 | 0.18062        |
|   | b | 9.3549  | 24.82989       |

Reduced Chi-sqr = 9.58324528716

COD(R^2) = 0.77058684946571

Iterations Performed = 9

Total Iterations in Session = 9

Fit converged. Chi-Sqr tolerance value of 1E-9 was reached.

## Statistics

|                         | G              |
|-------------------------|----------------|
| Number of Points        | 5              |
| Degrees of Freedom      | 3              |
| Reduced Chi-Sqr         | 9.58325        |
| Residual Sum of Squares | 28.74974       |
| Adj. R-Square           | 0.69412        |
| Fit Status              | Succeeded(100) |

Fit Status Code :

100 : Fit converged. Chi-Sqr tolerance value of 1E-9 was reached.

## Summary

|   | a       |                | b      |                | Statistics      |               |
|---|---------|----------------|--------|----------------|-----------------|---------------|
|   | Value   | Standard Error | Value  | Standard Error | Reduced Chi-Sqr | Adj. R-Square |
| G | 0.43934 | 0.18062        | 9.3549 | 24.82989       | 9.58325         | 0.69412       |

## ANOVA

|   |                   | DF | Sum of Squares | Mean Square | F Value   | Prob>F    |
|---|-------------------|----|----------------|-------------|-----------|-----------|
| G | Regression        | 2  | 6775.48015     | 3387.74008  | 353.50656 | 3.2845E-4 |
|   | Residual          | 3  | 28.74974       | 9.58325     |           |           |
|   | Uncorrected Total | 5  | 6804.22989     |             |           |           |
|   | Corrected Total   | 4  | 125.3186       |             |           |           |

## Fitted Curves Plot

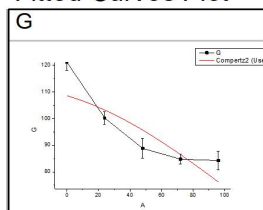

## Residual vs. Independent Plot

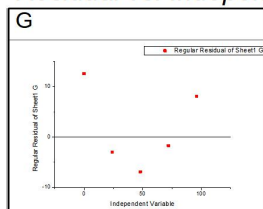

# Nonlinear Curve Fit (Compertz2 (User)) (2020/6/21 12:48:01)

## Parameters

|   |   | Value    | Standard Error |
|---|---|----------|----------------|
| F | a | 2.99911  | 1.21978        |
|   | b | 11.68154 | 6.60066        |

Reduced Chi-sqr = 21.8978434825

COD(R^2) = 0.97567169080392

Iterations Performed = 14

Total Iterations in Session = 14

Fit converged. Chi-Sqr tolerance value of 1E-9 was reached.

## Statistics

|                         | F              |
|-------------------------|----------------|
| Number of Points        | 5              |
| Degrees of Freedom      | 3              |
| Reduced Chi-Sqr         | 21.89784       |
| Residual Sum of Squares | 65.69353       |
| Adj. R-Square           | 0.96756        |
| Fit Status              | Succeeded(100) |

Fit Status Code :

100 : Fit converged. Chi-Sqr tolerance value of 1E-9 was reached.

## Summary

|   | a       |                | b        |                | Statistics      |               |
|---|---------|----------------|----------|----------------|-----------------|---------------|
|   | Value   | Standard Error | Value    | Standard Error | Reduced Chi-Sqr | Adj. R-Square |
| F | 2.99911 | 1.21978        | 11.68154 | 6.60066        | 21.89784        | 0.96756       |

## ANOVA

|   |                   | DF | Sum of Squares | Mean Square | F Value   | Prob>F     |
|---|-------------------|----|----------------|-------------|-----------|------------|
| F | Regression        | 2  | 10443.00082    | 5221.50041  | 238.44816 | 5.90013E-4 |
|   | Residual          | 3  | 65.69353       | 21.89784    |           |            |
|   | Uncorrected Total | 5  | 10508.69435    |             |           |            |
|   | Corrected Total   | 4  | 2700.29166     |             |           |            |

## Fitted Curves Plot

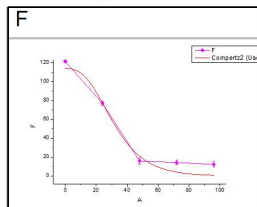

## Residual vs. Independent Plot

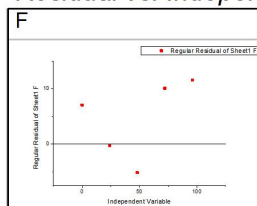

# Nonlinear Curve Fit (Compertz2 (User)) (2020/6/21 12:50:01)

## Parameters

|   |   | Value    | Standard Error |
|---|---|----------|----------------|
| E | a | 5.44044  | 1.36599        |
|   | b | 16.99485 | 2.00252        |

Reduced Chi-sqr = 16.790166204

COD(R^2) = 0.99584944606764

Iterations Performed = 8

Total Iterations in Session = 8

Fit converged. Chi-Sqr tolerance value of 1E-9 was reached.

## Statistics

|                         | E              |
|-------------------------|----------------|
| Number of Points        | 5              |
| Degrees of Freedom      | 3              |
| Reduced Chi-Sqr         | 16.79017       |
| Residual Sum of Squares | 50.3705        |
| Adj. R-Square           | 0.99447        |
| Fit Status              | Succeeded(100) |

Fit Status Code :

100 : Fit converged. Chi-Sqr tolerance value of 1E-9 was reached.

## Summary

|   | a       |                | b        |                | Statistics      |               |
|---|---------|----------------|----------|----------------|-----------------|---------------|
|   | Value   | Standard Error | Value    | Standard Error | Reduced Chi-Sqr | Adj. R-Square |
| E | 5.44044 | 1.36599        | 16.99485 | 2.00252        | 16.79017        | 0.99447       |

## ANOVA

|   |                   | DF | Sum of Squares | Mean Square | F Value   | Prob>F     |
|---|-------------------|----|----------------|-------------|-----------|------------|
| E | Regression        | 2  | 20473.268      | 10236.634   | 609.68033 | 1.45633E-4 |
|   | Residual          | 3  | 50.3705        | 16.79017    |           |            |
|   | Uncorrected Total | 5  | 20523.6385     |             |           |            |
|   | Corrected Total   | 4  | 12135.84968    |             |           |            |

## Fitted Curves Plot

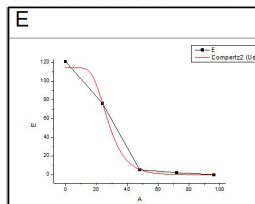

## Residual vs. Independent Plot

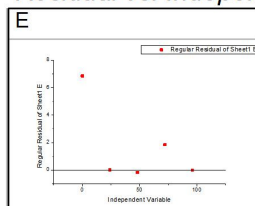

Supplement: Supplementary file [file 31747313]
